# Supplementary material for: Ultrasensitive detection of 244Pu in environmental samples by accelerator mass spectrometry
Source: Royal Society of Chemistry journal article supplement (doi:10.1039/d2ja00283c), 2022-01-01
Supplement: d2ja00283c1.pdf [file d2ja00283c1.pdf]

**Supplementary Fig. 1** Total energy loss spectrum, obtained from GIC of the 1MV AMS system, for 2.53 MeV  $^{242}\text{Pu}^{5+}$  (for IAEA 410 sediment sample, green circles) and  $^{244}\text{Pu}^{5+}$  ions (for ColPuS Pu standard, red triangles). The isotopes are used to set the region of interest

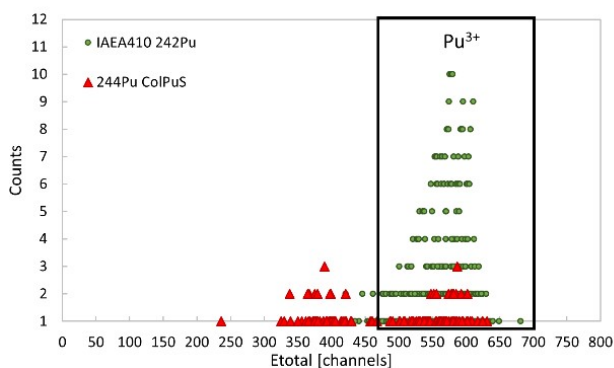

**Supplementary Fig. 2** Two dimensional Eres – dE and Total energy (minimized) spectrums, obtained from GIC of the 3MV AMS system, for 14.37 MeV  $^{242}\text{Pu}^{5+}$  (for IAEA 410 sediment sample) and  $^{244}\text{Pu}^{5+}$  ions (for ColPuS Pu standard)

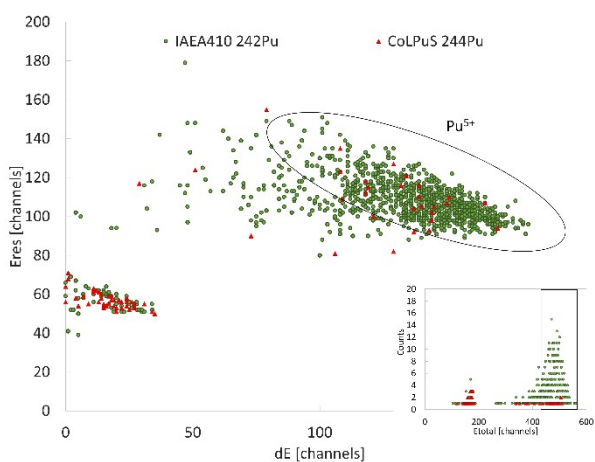

**Supplementary Table 1** Radiochemical recoveries of Pu (ED – Electrodeposition, MP – Microprecipitation)

| Sample                                                              | Measurement time | Measured Activity [Bq] | Chemical yield [%] |
|---------------------------------------------------------------------|------------------|------------------------|--------------------|
| AS2 ED, only $^{242}\text{Pu}$                                      | 6.9h             | $0.016 \pm 0.003$      | 76.6               |
| AS7 MP, only $^{242}\text{Pu}$                                      | 6.9h             | $0.021 \pm 0.004$      | 94.9               |
| AS10 MP, IAEA 410 spiked with $^{242}\text{Pu}$ and TEVA separation | 30.3h            | $0.018 \pm 0.001$      | 85.7               |
| AS16 MP, only $^{242}\text{Pu}$ and TEVA separation                 | 6.9h             | $0.054 \pm 0.006$      | 94.3               |

**Supplementary Table 2** The isotopic ratios for  $^{244}\text{Pu}/^{239}\text{Pu}$  with  $2\sigma$  uncertainties (using the confidence level given in <sup>[1]</sup>) and  $^{240}\text{Pu}/^{239}\text{Pu}$  with  $1\sigma$  uncertainties

| Sample/ Code                                           | $^{244}\text{Pu}/^{239}\text{Pu} (\cdot 10^{-4})$           | $^{240}\text{Pu}/^{239}\text{Pu}$ |
|--------------------------------------------------------|-------------------------------------------------------------|-----------------------------------|
| IAEA 410.1 IFIN-HH, this work                          | $3.38 \pm 0.65$                                             | $0.250 \pm 0.024$                 |
| IAEA 410.2 IFIN-HH, this work                          | $3.42 \begin{smallmatrix} +1.87 \\ -1.36 \end{smallmatrix}$ | $0.265 \pm 0.026$                 |
| IAEA 410.3 IFIN-HH, this work                          | $4.98 \pm 0.98$                                             | $0.259 \pm 0.024$                 |
| IAEA 410.4 IFIN-HH, this work                          | $4.50 \begin{smallmatrix} +2.79 \\ -2.02 \end{smallmatrix}$ | $0.218 \pm 0.023$                 |
| IAEA 410.5 IFIN-HH, this work                          | $2.50 \begin{smallmatrix} +1.89 \\ -1.33 \end{smallmatrix}$ | $0.226 \pm 0.022$                 |
| IAEA 410.6 IFIN-HH, this work                          | $3.38 \begin{smallmatrix} +2.29 \\ -1.63 \end{smallmatrix}$ | $0.290 \pm 0.069$                 |
| IAEA 410.7 IFIN-HH, this work                          | $1.97 \begin{smallmatrix} +1.91 \\ -1.24 \end{smallmatrix}$ | $0.265 \pm 0.064$                 |
| Bikini Atoll, Island, BL5 <sup>[2]</sup>               | $3.1 \begin{smallmatrix} +5.4 \\ -2.0 \end{smallmatrix}$    | $0.319 \pm 0.026$                 |
| Bikini Atoll, Island, BL6 <sup>[2]</sup>               | $5.4 \pm 1.6$                                               | $0.323 \pm 0.011$                 |
| IAEA 410, CNA Seville, Spain <sup>[3]</sup>            | /                                                           | $0.257 \pm 0.023$                 |
| IAEA 412.1 IFIN-HH, this work                          | $1.22 \begin{smallmatrix} +1.11 \\ -0.77 \end{smallmatrix}$ | $0.194 \pm 0.021$                 |
| IAEA 412.2 IFIN-HH, this work                          | $1.34 \begin{smallmatrix} +1.22 \\ -0.85 \end{smallmatrix}$ | $0.191 \pm 0.018$                 |
| IAEA 412.3 IFIN-HH, this work                          | $2.65 \begin{smallmatrix} +1.69 \\ -1.17 \end{smallmatrix}$ | $0.156 \pm 0.016$                 |
| IAEA 412.4 IFIN-HH, this work                          | $1.23 \begin{smallmatrix} +1.20 \\ -0.78 \end{smallmatrix}$ | $0.168 \pm 0.017$                 |
| IAEA 412, CNA Seville, Spain <sup>[3]</sup>            | /                                                           | $0.182 \pm 0.015$                 |
| Pacific Ocean, deep-sea manganese crust <sup>[4]</sup> | $1.0 \pm 0.3$                                               | /                                 |

## References

1. G. J. Feldman, R. D. Cousins, Phys. Rev., 1998, Volume D 57, 3873, <https://doi.org/10.1103/PhysRevD.57.3873>
2. J. Lachner, M. Christl, T. Bisinger, R. Michel, H.-A. Synal, Applied Radiation and Isotopes, 2010 Volume 68, Pages 979-983, <https://doi.org/10.1016/j.apradiso.2010.01.043>
3. E. Chamizo, M. López-Lora, M. Villa, N. Casacuberta, J. M. López-Gutiérrez, M. Khanh Pham, Nucl. Instr. Meth. B, 2015, Volume 361, Pages 535-540, <http://dx.doi.org/10.1016/j.nimb.2015.02.066>
4. A. Wallner, T. Faestermann, J. Feige, C. Feldstein, K. Knie, G. Korschinek, W. Kutschera, A. Ofan, M. Paul, F. Quinto, G. Rugel., P. Steier, Nature Communications, 2015, Volume 6, 5956, <https://doi.org/10.1038/ncomms6956>
